# Supplementary material for: Fabrication and Characterisation of Stimuli Responsive Piezoelectric PVDF and Hydroxyapatite-Filled PVDF Fibrous Membranes
Source: Molecules. 2019 May 17;24(10):1903. doi: 10.3390/molecules24101903 (PMC6571942; doi:10.3390/molecules24101903)
Supplement: Supplementary file 1 [file molecules-24-01903-s001.pdf]

# **Fabrication and characterisation of stimuli responsive piezoelectric PVDF and hydroxyapatite-filled PVDF fibrous membranes**

**Biranche Tandon <sup>1, 2</sup>, Prashant Kamble <sup>1</sup>, Richard T. Olsson <sup>3</sup>, Jonny J. Blaker <sup>1,2\*</sup>, Sarah H. Cartmell <sup>1\*</sup>**

<sup>1</sup> School of Materials, MSS Tower, the University of Manchester, Manchester M13 9PL, UK

<sup>2</sup> Bio-Active Materials Group, School of Materials, MSS Tower, the University of Manchester, Manchester M13 9PL, UK

<sup>3</sup> Department of Fibre and Polymer Technology, School of Chemical Science and Engineering, KTH Royal Institute of Technology, Teknikringen 56, SE-10044 Stockholm, Sweden

\* Corresponding authors

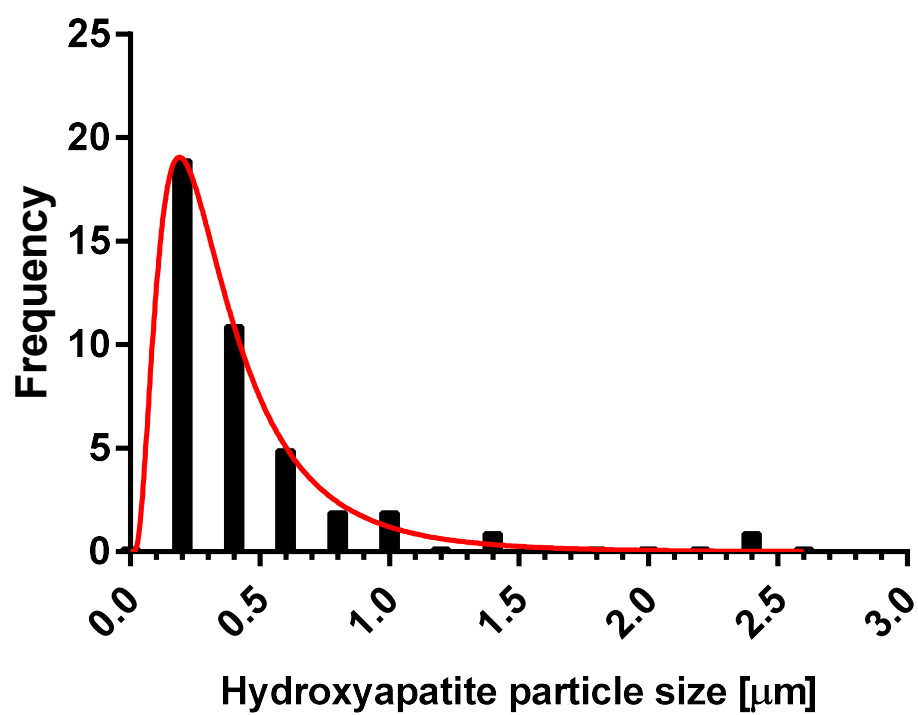

Figure S 1. Particle size distribution for HA particles.
